# Supplementary material for: Contrasting temporal trends and relationships of total organic carbon, black carbon, and polycyclic aromatic hydrocarbons in rural low-altitude and remote high-altitude lakes
Source: Royal Society of Chemistry journal article supplement (doi:10.1039/c0em00655f), 2011-01-01
Supplement: c0em00655f.pdf [file c0em00655f.pdf]

## Supplementary Information

### **Contrasting temporal trends and relationships of total organic carbon, black carbon, and polycyclic aromatic hydrocarbons in rural low-altitude and remote high-altitude lakes**

Christian Bogdal<sup>1,\*</sup>, Thomas D. Bucheli<sup>2</sup>, Tripti Agarwal<sup>2</sup>, Flavio S. Anselmetti<sup>3</sup>, Franziska Blum<sup>2</sup>, Konrad Hungerbühler<sup>1</sup>, Martin Kohler<sup>4,5</sup>, Peter Schmid<sup>4</sup>, Martin Scheringer<sup>1</sup>, Anna Sobek<sup>2,6</sup>

<sup>1</sup>Institute for Chemical and Bioengineering, ETH Zurich, Wolfgang-Pauli-Strasse 10, CH-8093 Zürich, Switzerland;

<sup>2</sup>Agroscope Reckenholz-Tänikon Research Station ART, Reckenholzstrasse 191, CH-8046 Zürich, Switzerland;

<sup>3</sup>Eawag, Swiss Federal Institute of Aquatic Science and Technology, Überlandstrasse 133, CH-8600 Dübendorf, Switzerland;

<sup>4</sup>Empa, Swiss Federal Laboratories for Materials Testing and Research, Überlandstrasse 129, CH-8600 Dübendorf, Switzerland;

<sup>5</sup> Present address: State Food Law Enforcement Authority, Werkhofstrasse 5, CH-4509 Solothurn, Switzerland.

<sup>6</sup> Present address: Länsstyrelsen Gävleborg, 801 70 Gävle, Sweden

\*corresponding author, phone: +41 44 632 5951, email: christian.bogdal@chem.ethz.ch

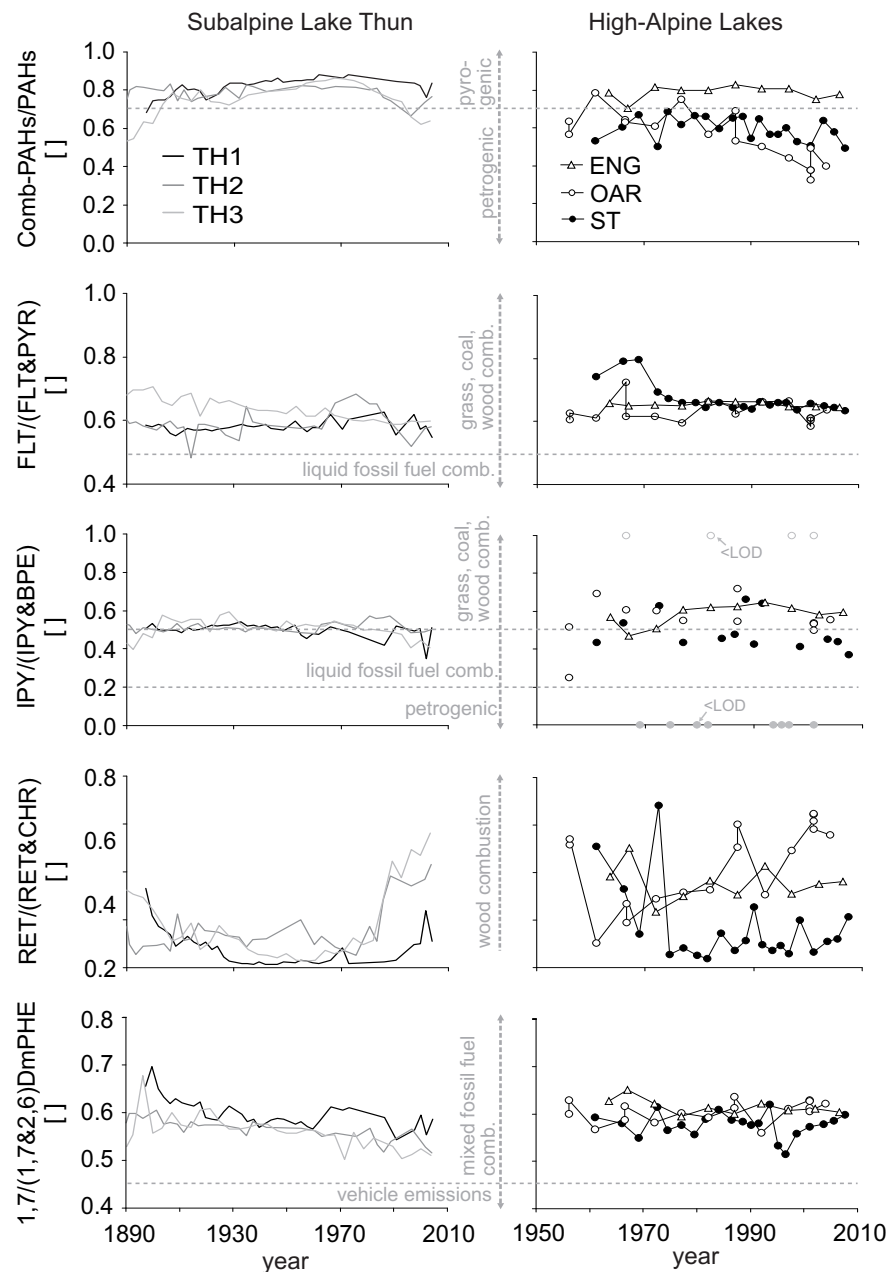

**Figure S1.** Source-characteristic PAH ratios and molecular markers in three dated sediment cores (TH1, TH2, and TH3) from Lake Thun and sediment cores from mountain lakes (Lake Engstlen ENG, Lake Oberaar OAR, Lake Stein ST).

### Rationale

FLT, PYR, BaA, CHR, BbF, BkF, BaP, IPY, and BPE (denoted Comb-PAHs) were stated to be markers for pyrogenic origin<sup>1</sup>. The ratio Comb-PAHs / PAHs, where PAHs denotes the 16 EPA PAHs, higher than 0.7 indicates combustion dominated source, whereas a lower ratio points towards petrogenic origin<sup>1</sup>.

Other frequently applied ratios are FLT / (FLT&PYR) and IPY / (IPY&BPE). FLT / (FLT&PYR) and IPY / (IPY&BPE) are possible markers for the distinction between grass, coal, or wood combustion, and fossil fuel combustion<sup>2-4</sup>.

As the formation of PAHs by combustion of wood may be identified by RET<sup>5</sup>, the ratio RET / (RET&CHR) was calculated.

1,7 / (1,7&2,6)DmPHE may reveal vehicle emissions (ratio <0.45) and mixed combustion of fossil fuel (0.45-0.7)<sup>2</sup>.

### References

1. H.-M. Hwang, T. L. Wade and J. L. Sericano, *Atmos. Environ.*, 2003, 37, 2259-2267.
2. M. B. Yunker, R. W. Macdonald, R. Vingarzan, R. H. Mitchell, D. Goyette and S. Sylvestre, *Org. Geochem.*, 2002, 33, 489-515.
3. T. D. Bucheli, F. Blum, A. Desaulles and O. Gustafsson, *Chemosphere*, 2004, 56, 1061-1076.
4. R. C. Brändli, T. D. Bucheli, S. Ammann, A. Desaulles, A. Keller, F. Blum and W. A. Stahel, *J. Environ. Monit.*, 2008, 10, 1278-1286.
5. T. Ramdahl, *Nature*, 1983, 306, 580-582.

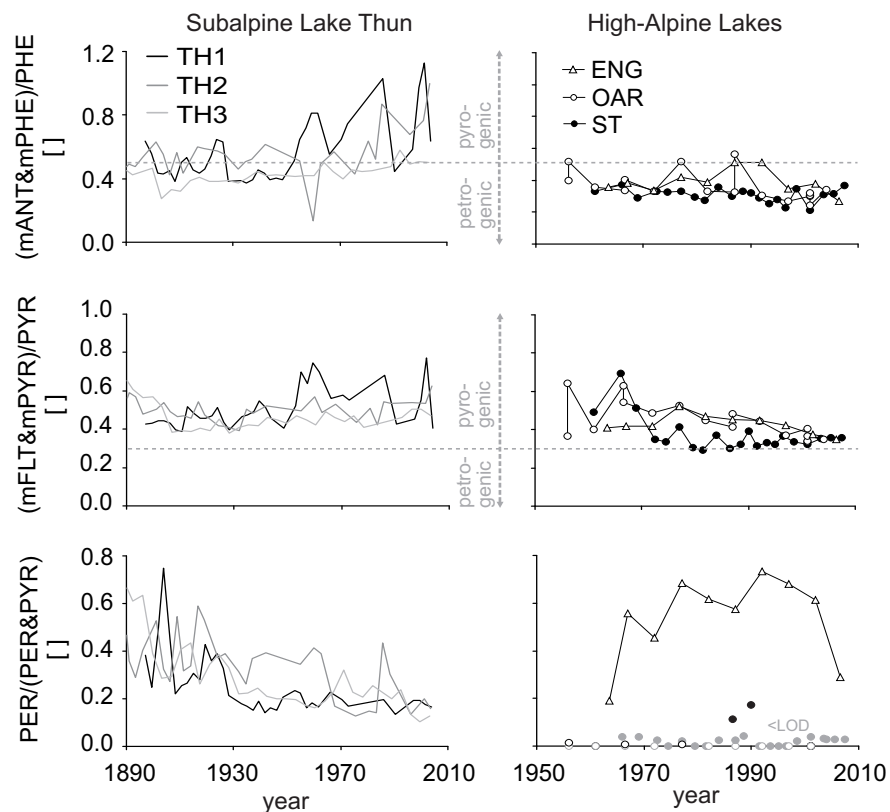

**Figure S2.** Source-characteristic PAH ratios and molecular markers in three dated sediment cores (TH1, TH2, and TH3) from Lake Thun and sediment cores from mountain lakes (Lake Engstlen ENG, Lake Oberaar OAR, Lake Stein ST).

### Rationale

(mANT&mPHE)/PHE and (mFLT&mPYR)/PYR are ratios indicating pyrogenic sources of PAHs, when they are above 0.5 and 0.3, respectively<sup>1</sup>. (Brändli et al., 2008).

PER can be formed *in situ* from non-specific precursor materials by biotic and abiotic diagenetic processes under anoxic conditions in sediment<sup>2-3</sup>.

### References

1. R. C. Brändli, T. D. Bucheli, S. Ammann, A. Desaulles, A. Keller, F. Blum and W. A. Stahel, *J. Environ. Monit.*, 2008, 10, 1278-1286.
2. S. G. Wakeham, C. Schaffner and W. Giger, *Geochim. Cosmochim. Acta*, 1982, 44, 415-429.
3. J. E. Silliman, P. A. Meyers and B. J. Eadie, *Org. Geochem.*, 1998, 29, 1737-1744.

**Table S1.** Total organic carbon, black carbon, and polycyclic aromatic hydrocarbons in dated sediment core TH1 from Lake Thun.

| year | sediment flux<br>[g/m <sup>2</sup> /y] | total<br>organic carbon<br>[mg/g] | black carbon<br>[mg/g] | naphthalene<br>[µg/kg] | acenaphthylene<br>[µg/kg] | acenaphthene<br>[µg/kg] | fluorene<br>[µg/kg] | phenanthrene<br>[µg/kg] | anthracene<br>[µg/kg] | fluoranthene<br>[µg/kg] |
|------|----------------------------------------|-----------------------------------|------------------------|------------------------|---------------------------|-------------------------|---------------------|-------------------------|-----------------------|-------------------------|
| 2004 | 3184                                   | 21.7                              | 1.3                    | 43                     | 4                         | 7                       | 13                  | 110                     | 18                    | 241                     |
| 2001 | 3492                                   | 20.3                              | 1.1                    | 19                     | 1                         | 4                       | 7                   | 70                      | 9                     | 78                      |
| 2000 | 2570                                   | 22.5                              | 1.5                    | 23                     | 8                         | 5                       | 11                  | 108                     | 18                    | 157                     |
| 1997 | 2282                                   | 24.1                              | 1.2                    | n.a.                   | n.a.                      | n.a.                    | n.a.                | n.a.                    | n.a.                  | n.a.                    |
| 1993 | 2232                                   | 26.4                              | 1.4                    | 20                     | 3                         | 5                       | 10                  | 82                      | 7                     | 175                     |
| 1991 | 2215                                   | 24.6                              | 1.4                    | 20                     | 3                         | 9                       | 18                  | 152                     | 13                    | 283                     |
| 1987 | 2409                                   | 26.1                              | 2.3                    | n.a.                   | n.a.                      | n.a.                    | n.a.                | n.a.                    | n.a.                  | n.a.                    |
| 1978 | 1936                                   | 32.4                              | 1.7                    | 22                     | 3                         | 6                       | 15                  | 151                     | 42                    | 331                     |
| 1973 | 1887                                   | 28.0                              | 1.7                    | 31                     | 7                         | 10                      | 21                  | 191                     | 44                    | 549                     |
| 1971 | 2014                                   | 29.5                              | 1.5                    | 30                     | 5                         | 11                      | 21                  | 173                     | 31                    | 360                     |
| 1966 | 1650                                   | 23.5                              | 1.5                    | 37                     | 12                        | 18                      | 32                  | 285                     | 62                    | 764                     |
| 1962 | 1895                                   | 25.2                              | 2.2                    | 35                     | 8                         | 11                      | 28                  | 233                     | 66                    | 625                     |
| 1960 | 2009                                   | 22.6                              | 2.3                    | 35                     | 7                         | 11                      | 29                  | 236                     | 56                    | 462                     |
| 1957 | 2860                                   | 20.3                              | 2.8                    | 41                     | 12                        | 19                      | 34                  | 399                     | 69                    | 672                     |
| 1955 | 3012                                   | 16.9                              | 2.0                    | 29                     | 6                         | 12                      | 26                  | 214                     | 39                    | 383                     |
| 1953 | 2831                                   | 22.9                              | 2.0                    | 22                     | 5                         | 12                      | 21                  | 182                     | 25                    | 360                     |
| 1948 | 2315                                   | 19.7                              | 2.0                    | 59                     | 51                        | 13                      | 50                  | 539                     | 263                   | 1124                    |
| 1946 | 2884                                   | 20.1                              | 1.5                    | 66                     | 32                        | 43                      | 69                  | 846                     | 112                   | 1775                    |
| 1944 | 2684                                   | 28.7                              | 1.9                    | 64                     | 35                        | 25                      | 86                  | 950                     | 131                   | 1773                    |
| 1939 | 2730                                   | n.a.                              | 2.2                    | 78                     | 57                        | 28                      | 106                 | 1266                    | 150                   | 2475                    |

n.a. = not available

**Table S1.** continued.

| year | sediment flux<br>[g/m <sup>2</sup> /y] | total<br>organic carbon<br>[mg/g] | black carbon<br>[mg/g] | naphthalene<br>[µg/kg] | acenaphthylene<br>[µg/kg] | acenaphthene<br>[µg/kg] | fluorene<br>[µg/kg] | phenanthrene<br>[µg/kg] | anthracene<br>[µg/kg] | fluoranthene<br>[µg/kg] |
|------|----------------------------------------|-----------------------------------|------------------------|------------------------|---------------------------|-------------------------|---------------------|-------------------------|-----------------------|-------------------------|
| 1939 | 3744                                   | 20.5                              | 3.1                    | 63                     | 33                        | 25                      | 81                  | 833                     | 111                   | 1503                    |
| 1939 | 2835                                   | 20.0                              | 2.4                    | 64                     | 45                        | 27                      | 90                  | 1047                    | 107                   | 1718                    |
| 1937 | 2755                                   | 17.2                              | 1.4                    | 44                     | 35                        | 15                      | 54                  | 593                     | 62                    | 974                     |
| 1935 | 3168                                   | 16.6                              | 1.2                    | 44                     | 35                        | 13                      | 42                  | 471                     | 50                    | 828                     |
| 1930 | 3688                                   | 22.3                              | 0.9                    | 36                     | 13                        | 10                      | 28                  | 311                     | 49                    | 536                     |
| 1930 | 3496                                   | 14.9                              | 1.0                    | 35                     | 10                        | 11                      | 24                  | 238                     | 23                    | 354                     |
| 1928 | 2806                                   | 19.0                              | 1.0                    | 40                     | 5                         | 12                      | 23                  | 188                     | 24                    | 240                     |
| 1926 | 3257                                   | 16.9                              | 1.1                    | 41                     | 5                         | 12                      | 26                  | 211                     | 54                    | 250                     |
| 1923 | 3023                                   | 20.7                              | 1.2                    | 38                     | 3                         | 10                      | 25                  | 182                     | 27                    | 197                     |
| 1921 | 3304                                   | 15.0                              | 1.9                    | 55                     | 6                         | 10                      | 21                  | 184                     | 30                    | 270                     |
| 1919 | 3228                                   | 16.2                              | 1.4                    | 44                     | 6                         | 11                      | 20                  | 174                     | 27                    | 262                     |
| 1917 | 3059                                   | 13.7                              | 1.3                    | 45                     | 6                         | 11                      | 23                  | 177                     | 29                    | 266                     |
| 1914 | 2987                                   | 14.1                              | 1.2                    | 46                     | 8                         | 13                      | 26                  | 234                     | 44                    | 401                     |
| 1912 | 3340                                   | 12.9                              | 1.3                    | 43                     | 6                         | 16                      | 30                  | 283                     | 51                    | 389                     |
| 1910 | 3327                                   | 12.5                              | 1.4                    | 31                     | 3                         | 8                       | 16                  | 124                     | 20                    | 157                     |
| 1908 | 3552                                   | 12.6                              | 1.1                    | 24                     | 2                         | 5                       | 11                  | 76                      | 10                    | 85                      |
| 1905 | 3496                                   | 11.3                              | 1.0                    | 35                     | 2                         | 8                       | 17                  | 140                     | 17                    | 148                     |
| 1903 | 3654                                   | 11.2                              | 0.9                    | 42                     | 4                         | 9                       | 21                  | 155                     | 20                    | 172                     |
| 1901 | 3588                                   | 11.4                              | 0.9                    | 36                     | 4                         | 5                       | 19                  | 116                     | 15                    | 103                     |
| 1899 | 4168                                   | 12.4                              | 0.8                    | n.a.                   | n.a.                      | n.a.                    | n.a.                | n.a.                    | n.a.                  | n.a.                    |

n.a. = not available

**Table S2.** Polycyclic aromatic hydrocarbons in dated sediment core TH1 from Lake Thun.

| year | pyrene<br>[µg/kg] | benzo[ <i>a</i> ] anthracene<br>[µg/kg] | chrysene<br>[µg/kg] | benzo[ <i>b</i> ] fluoranthene<br>[µg/kg] | benzo[ <i>k</i> ] fluoranthene<br>[µg/kg] | benzo[ <i>a</i> ] pyrene<br>[µg/kg] | indeno[1,2,3, <i>c,d</i> ] pyrene<br>[µg/kg] | dibenzo[ <i>a,h</i> ]anthracene<br>[µg/kg] | Benzo[ <i>g,h,i</i> ]perylene<br>[µg/kg] | sum 16 PAHs<br>[µg/kg] |
|------|-------------------|-----------------------------------------|---------------------|-------------------------------------------|-------------------------------------------|-------------------------------------|----------------------------------------------|--------------------------------------------|------------------------------------------|------------------------|
| 2004 | 200               | 102                                     | 109                 | 87                                        | 46                                        | 109                                 | 85                                           | 14                                         | 81                                       | 1270                   |
| 2001 | 55                | 35                                      | 62                  | 42                                        | 16                                        | 28                                  | 26                                           | 11                                         | 47                                       | 511                    |
| 2000 | 117               | 74                                      | 100                 | 90                                        | 47                                        | 101                                 | 85                                           | 12                                         | 83                                       | 1037                   |
| 1997 | n.a.              | n.a.                                    | n.a.                | n.a.                                      | n.a.                                      | n.a.                                | n.a.                                         | n.a.                                       | n.a.                                     | n.a.                   |
| 1993 | 108               | 54                                      | 82                  | 65                                        | 34                                        | 66                                  | 57                                           | 9                                          | 59                                       | 836                    |
| 1991 | 227               | 109                                     | 154                 | 119                                       | 63                                        | 119                                 | 96                                           | 12                                         | 88                                       | 1483                   |
| 1987 | n.a.              | n.a.                                    | n.a.                | n.a.                                      | n.a.                                      | n.a.                                | n.a.                                         | n.a.                                       | n.a.                                     | n.a.                   |
| 1978 | 197               | 159                                     | 242                 | 218                                       | 84                                        | 181                                 | 139                                          | 53                                         | 191                                      | 2036                   |
| 1973 | 359               | 258                                     | 358                 | 323                                       | 149                                       | 279                                 | 232                                          | 64                                         | 242                                      | 3117                   |
| 1971 | 268               | 174                                     | 235                 | 247                                       | 120                                       | 207                                 | 219                                          | 52                                         | 219                                      | 2373                   |
| 1966 | 470               | 325                                     | 415                 | 403                                       | 215                                       | 397                                 | 342                                          | 82                                         | 320                                      | 4176                   |
| 1962 | 457               | 349                                     | 467                 | 473                                       | 215                                       | 362                                 | 345                                          | 108                                        | 381                                      | 4162                   |
| 1960 | 340               | 249                                     | 364                 | 316                                       | 145                                       | 260                                 | 247                                          | 75                                         | 266                                      | 3098                   |
| 1957 | 516               | 345                                     | 508                 | 522                                       | 204                                       | 378                                 | 382                                          | 100                                        | 458                                      | 4657                   |
| 1955 | 278               | 182                                     | 295                 | 271                                       | 125                                       | 221                                 | 241                                          | 71                                         | 271                                      | 2664                   |
| 1953 | 243               | 146                                     | 208                 | 204                                       | 96                                        | 171                                 | 190                                          | 45                                         | 172                                      | 2102                   |
| 1948 | 852               | 491                                     | 658                 | 607                                       | 302                                       | 613                                 | 546                                          | 126                                        | 564                                      | 6858                   |
| 1946 | 1321              | 660                                     | 1006                | 838                                       | 451                                       | 785                                 | 654                                          | 128                                        | 619                                      | 9403                   |
| 1944 | 1307              | 633                                     | 894                 | 709                                       | 400                                       | 741                                 | 563                                          | 106                                        | 535                                      | 8954                   |
| 1939 | 1733              | 890                                     | 1262                | 1013                                      | 556                                       | 987                                 | 769                                          | 147                                        | 702                                      | 12219                  |

n.a. = not available

**Table S2.** continued.

| year | pyrene<br>[µg/kg] | benzo[ <i>a</i> ] anthracene<br>[µg/kg] | chrysene<br>[µg/kg] | benzo[ <i>b</i> ] fluoranthene<br>[µg/kg] | benzo[ <i>k</i> ] fluoranthene<br>[µg/kg] | benzo[ <i>a</i> ] pyrene<br>[µg/kg] | indeno[1,2,3- <i>c,d</i> ] pyrene<br>[µg/kg] | dibenzo[ <i>a,h</i> ]anthracene<br>[µg/kg] | Benzo[ <i>g,h,i</i> ]perylene<br>[µg/kg] | sum 16 PAHs<br>[µg/kg] |
|------|-------------------|-----------------------------------------|---------------------|-------------------------------------------|-------------------------------------------|-------------------------------------|----------------------------------------------|--------------------------------------------|------------------------------------------|------------------------|
| 1939 | 1071              | 598                                     | 822                 | 646                                       | 374                                       | 681                                 | 512                                          | 108                                        | 484                                      | 7945                   |
| 1939 | 1236              | 656                                     | 901                 | 662                                       | 395                                       | 717                                 | 528                                          | 104                                        | 482                                      | 8778                   |
| 1937 | 694               | 354                                     | 510                 | 409                                       | 227                                       | 411                                 | 328                                          | 67                                         | 301                                      | 5078                   |
| 1935 | 578               | 320                                     | 428                 | 362                                       | 214                                       | 382                                 | 338                                          | 64                                         | 284                                      | 4455                   |
| 1930 | 394               | 217                                     | 269                 | 236                                       | 133                                       | 248                                 | 223                                          | 35                                         | 203                                      | 2942                   |
| 1930 | 261               | 140                                     | 187                 | 149                                       | 83                                        | 155                                 | 135                                          | 16                                         | 123                                      | 1945                   |
| 1928 | 180               | 96                                      | 134                 | 109                                       | 52                                        | 95                                  | 103                                          | 16                                         | 95                                       | 1411                   |
| 1926 | 190               | 103                                     | 144                 | 117                                       | 56                                        | 108                                 | 110                                          | 16                                         | 100                                      | 1542                   |
| 1923 | 147               | 79                                      | 108                 | 77                                        | 39                                        | 78                                  | 77                                           | 11                                         | 74                                       | 1171                   |
| 1921 | 204               | 117                                     | 150                 | 125                                       | 60                                        | 124                                 | 117                                          | 16                                         | 115                                      | 1602                   |
| 1919 | 197               | 106                                     | 141                 | 120                                       | 59                                        | 120                                 | 116                                          | 18                                         | 118                                      | 1541                   |
| 1917 | 196               | 109                                     | 139                 | 121                                       | 60                                        | 111                                 | 114                                          | 16                                         | 109                                      | 1531                   |
| 1914 | 310               | 173                                     | 222                 | 193                                       | 91                                        | 189                                 | 163                                          | 28                                         | 174                                      | 2314                   |
| 1912 | 315               | 172                                     | 208                 | 171                                       | 82                                        | 176                                 | 151                                          | 23                                         | 153                                      | 2269                   |
| 1910 | 124               | 63                                      | 76                  | 64                                        | 30                                        | 67                                  | 58                                           | 10                                         | 58                                       | 907                    |
| 1908 | 61                | 33                                      | 48                  | 40                                        | 19                                        | 40                                  | 35                                           | 5                                          | 35                                       | 528                    |
| 1905 | 103               | 56                                      | 76                  | 69                                        | 32                                        | 61                                  | 70                                           | 10                                         | 69                                       | 913                    |
| 1903 | 125               | 68                                      | 86                  | 65                                        | 30                                        | 67                                  | 76                                           | 7                                          | 66                                       | 1012                   |
| 1901 | 73                | 34                                      | 49                  | 36                                        | 17                                        | 33                                  | 41                                           | 3                                          | 40                                       | 626                    |
| 1899 | n.a.              | n.a.                                    | n.a.                | n.a.                                      | n.a.                                      | n.a.                                | n.a.                                         | n.a.                                       | n.a.                                     | n.a.                   |

n.a. = not available

**Table S3.** Total organic carbon, black carbon, and polycyclic aromatic hydrocarbons in dated sediment core TH2 from Lake Thun.

| year | sediment flux<br>[g/m <sup>2</sup> /y] | total<br>organic carbon<br>[mg/g] | black carbon<br>[mg/g] | naphthalene<br>[µg/kg] | acenaphthylene<br>[µg/kg] | acenaphthene<br>[µg/kg] | fluorene<br>[µg/kg] | phenanthrene<br>[µg/kg] | anthracene<br>[µg/kg] | fluoranthene<br>[µg/kg] |
|------|----------------------------------------|-----------------------------------|------------------------|------------------------|---------------------------|-------------------------|---------------------|-------------------------|-----------------------|-------------------------|
| 2004 | 1884                                   | 13.2                              | 1.0                    | n.a.                   | 2                         | 8                       | 10                  | 58                      | 3                     | 55                      |
| 2002 | 1572                                   | 12.6                              | 1.1                    | 30                     | 2                         | 4                       | 11                  | 65                      | 5                     | 72                      |
| 2000 | 1904                                   | 14.1                              | 1.0                    | n.a.                   | n.a.                      | n.a.                    | n.a.                | n.a.                    | n.a.                  | n.a.                    |
| 1996 | 1311                                   | 13.1                              | 1.1                    | 84                     | 13                        | 6                       | 27                  | 69                      | 15                    | 86                      |
| 1993 | 1766                                   | 13.4                              | 1.0                    | n.a.                   | n.a.                      | n.a.                    | n.a.                | n.a.                    | n.a.                  | n.a.                    |
| 1989 | 1575                                   | n.a.                              | 0.8                    | 29                     | 2                         | 5                       | 11                  | 75                      | 5                     | 83                      |
| 1987 | 1585                                   | 13.7                              | 1.1                    | 32                     | 2                         | 8                       | 13                  | 91                      | 5                     | 114                     |
| 1983 | 1183                                   | 15.8                              | 1.1                    | 29                     | 3                         | 7                       | 14                  | 101                     | 10                    | 194                     |
| 1979 | 1260                                   | 18.2                              | 1.4                    | 33                     | 3                         | 9                       | 16                  | 118                     | 9                     | 204                     |
| 1972 | 881                                    | 15.7                              | 1.2                    | 30                     | 3                         | 8                       | 15                  | 109                     | 11                    | 207                     |
| 1961 | 1013                                   | 16.0                              | 1.1                    | 29                     | 4                         | 6                       | 14                  | 93                      | 10                    | 161                     |
| 1954 | 1308                                   | 17.6                              | 0.6                    | 47                     | 6                         | 14                      | 25                  | 261                     | 38                    | 357                     |
| 1951 | 1817                                   | 15.1                              | 0.7                    | 34                     | 5                         | 11                      | 23                  | 210                     | 33                    | 333                     |
| 1946 | 2032                                   | 16.5                              | 0.7                    | 21                     | 5                         | 4                       | 11                  | 88                      | 14                    | 155                     |
| 1943 | 2565                                   | 10.1                              | 1.0                    | n.a.                   | n.a.                      | n.a.                    | n.a.                | n.a.                    | n.a.                  | n.a.                    |
| 1939 | 1906                                   | 10.5                              | 1.2                    | 21                     | 4                         | 4                       | 11                  | 71                      | 9                     | 93                      |
| 1935 | 1475                                   | 10.5                              | 0.9                    | 25                     | 6                         | 5                       | 16                  | 125                     | 15                    | 183                     |
| 1931 | 1276                                   | 12.7                              | 1.2                    | 32                     | 6                         | 7                       | 19                  | 143                     | 17                    | 260                     |
| 1931 | 1438                                   | 11.3                              | 0.9                    | 38                     | 88                        | 3                       | 26                  | 154                     | 177                   | 275                     |

n.a. = not available



**Table S3.** continued.

| year | sediment flux<br>[g/m <sup>2</sup> /y] | total<br>organic carbon<br>[mg/g] | black carbon<br>[mg/g] | naphthalene<br>[µg/kg] | acenaphthylene<br>[µg/kg] | acenaphthene<br>[µg/kg] | fluorene<br>[µg/kg] | phenanthrene<br>[µg/kg] | anthracene<br>[µg/kg] | fluoranthene<br>[µg/kg] |
|------|----------------------------------------|-----------------------------------|------------------------|------------------------|---------------------------|-------------------------|---------------------|-------------------------|-----------------------|-------------------------|
| 1926 | 1703                                   | 10.4                              | 0.7                    | 35                     | 8                         | 4                       | 11                  | 79                      | 27                    | 136                     |
| 1923 | 1955                                   | 7.8                               | 1.2                    | 28                     | 4                         | 4                       | 9                   | 67                      | 11                    | 96                      |
| 1919 | 2405                                   | 8.1                               | 1.2                    | n.a.                   | n.a.                      | n.a.                    | n.a.                | n.a.                    | n.a.                  | n.a.                    |
| 1915 | 1661                                   | 8.8                               | 0.8                    | 21                     | 3                         | 3                       | 8                   | 66                      | 5                     | 78                      |
| 1912 | 2305                                   | 8.3                               | 0.8                    | 19                     | 3                         | 3                       | 8                   | 54                      | 4                     | 63                      |
| 1908 | 2119                                   | 9.7                               | 0.8                    | 93                     | 65                        | 5                       | 25                  | 208                     | 388                   | 351                     |
| 1908 | 2266                                   | 8.7                               | 0.6                    | 35                     | 9                         | 6                       | 18                  | 148                     | 19                    | 220                     |
| 1906 | 2659                                   | 10.1                              | 0.5                    | 29                     | 7                         | 3                       | 13                  | 98                      | 10                    | 106                     |
| 1903 | 2169                                   | 10.7                              | 0.7                    | 32                     | 17                        | 5                       | 19                  | 209                     | 18                    | 344                     |
| 1899 | 2160                                   | 8.9                               | 0.4                    | 28                     | 10                        | 5                       | 17                  | 156                     | 14                    | 207                     |
| 1895 | 2697                                   | 9.7                               | 0.5                    | 22                     | 8                         | 5                       | 15                  | 137                     | 16                    | 186                     |
| 1888 | 2343                                   | 8.7                               | 0.4                    | 27                     | 10                        | 5                       | 15                  | 135                     | 15                    | 198                     |
| 1884 | 1935                                   | 9.9                               | 0.6                    | 31                     | 19                        | 4                       | 20                  | 184                     | 24                    | 272                     |
| 1881 | 2556                                   | 7.9                               | 0.9                    | 22                     | 12                        | 3                       | 13                  | 111                     | 16                    | 160                     |
| 1877 | 2525                                   | 8.4                               | 0.7                    | 22                     | 2                         | 2                       | 7                   | 40                      | 3                     | 39                      |
| 1873 | 2751                                   | 9.4                               | 0.6                    | 31                     | 3                         | 6                       | 8                   | 40                      | 4                     | 43                      |
| 1870 | 2382                                   | 9.2                               | 0.7                    | 19                     | 3                         | 2                       | 8                   | 47                      | 5                     | 43                      |
| 1866 | 2841                                   | 9.1                               | 0.6                    | 29                     | 27                        | 3                       | 17                  | 161                     | 29                    | 221                     |
| 1862 | 2923                                   | 10.6                              | 0.5                    | n.a.                   | n.a.                      | n.a.                    | n.a.                | n.a.                    | n.a.                  | n.a.                    |

n.a. = not available

**Table S4.** Polycyclic aromatic hydrocarbons in dated sediment core TH2 from Lake Thun.

| year | pyrene<br>[µg/kg] | benzo[ <i>a</i> ] anthracene<br>[µg/kg] | chrysene<br>[µg/kg] | benzo[ <i>b</i> ] fluoranthene<br>[µg/kg] | benzo[ <i>k</i> ]fluoranthene<br>[µg/kg] | benzo[ <i>a</i> ]pyrene<br>[µg/kg] | indeno[1,2,3, <i>c,d</i> ] pyrene<br>[µg/kg] | dibenzo[ <i>a,h</i> ]anthracene<br>[µg/kg] | Benzo[ <i>g,h,i</i> ]perylene<br>[µg/kg] | sum 16 PAHs<br>[µg/kg] |
|------|-------------------|-----------------------------------------|---------------------|-------------------------------------------|------------------------------------------|------------------------------------|----------------------------------------------|--------------------------------------------|------------------------------------------|------------------------|
| 2004 | 40                | 18                                      | 36                  | 26                                        | 12                                       | 30                                 | 28                                           | 3                                          | 28                                       | 356                    |
| 2002 | 53                | 24                                      | 44                  | 33                                        | 15                                       | 35                                 | 32                                           | 4                                          | 33                                       | 466                    |
| 2000 | n.a.              | n.a.                                    | n.a.                | n.a.                                      | n.a.                                     | n.a.                               | n.a.                                         | n.a.                                       | n.a.                                     | n.a.                   |
| 1996 | 80                | 34                                      | 54                  | 36                                        | 22                                       | 52                                 | 30                                           |                                            | 32                                       | 641                    |
| 1993 | n.a.              | n.a.                                    | n.a.                | n.a.                                      | n.a.                                     | n.a.                               | n.a.                                         | n.a.                                       | n.a.                                     | n.a.                   |
| 1989 | 56                | 24                                      | 46                  | 33                                        | 18                                       | 37                                 | 39                                           |                                            | 29                                       | 492                    |
| 1987 | 71                | 36                                      | 59                  | 46                                        | 24                                       | 55                                 | 49                                           | 4                                          | 38                                       | 646                    |
| 1983 | 104               | 49                                      | 80                  | 70                                        | 37                                       | 71                                 | 69                                           | 7                                          | 54                                       | 898                    |
| 1979 | 109               | 54                                      | 87                  | 76                                        | 40                                       | 77                                 | 83                                           | 6                                          | 62                                       | 986                    |
| 1972 | 96                | 51                                      | 93                  | 86                                        | 53                                       | 92                                 | 67                                           | 7                                          | 65                                       | 993                    |
| 1961 | 85                | 48                                      | 93                  | 89                                        | 48                                       | 74                                 | 76                                           | 7                                          | 64                                       | 902                    |
| 1954 | 266               | 168                                     | 193                 | 154                                       | 85                                       | 219                                | 134                                          | 15                                         | 119                                      | 2101                   |
| 1951 | 239               | 159                                     | 180                 | 155                                       | 73                                       | 199                                | 101                                          | 30                                         | 110                                      | 1894                   |
| 1946 | 115               | 77                                      | 80                  | 68                                        | 32                                       | 93                                 | 45                                           | 11                                         | 48                                       | 866                    |
| 1943 | n.a.              | n.a.                                    | n.a.                | n.a.                                      | n.a.                                     | n.a.                               | n.a.                                         | n.a.                                       | n.a.                                     | n.a.                   |
| 1939 | 66                | 37                                      | 62                  | 63                                        | 25                                       | 61                                 | 46                                           | 9                                          | 45                                       | 626                    |
| 1935 | 124               | 70                                      | 116                 | 120                                       | 52                                       | 108                                | 92                                           | 16                                         | 88                                       | 1161                   |
| 1931 | 143               | 86                                      | 154                 | 158                                       | 66                                       | 106                                | 101                                          | 21                                         | 106                                      | 1426                   |
| 1931 | 239               | 126                                     | 174                 | 179                                       | 82                                       | 244                                | 145                                          | 24                                         | 140                                      | 2115                   |

n.a. = not available

**Table S4.** continued.

| year | pyrene<br>[µg/kg] | benzo[ <i>a</i> ] anthracene<br>[µg/kg] | chrysene<br>[µg/kg] | benzo[ <i>b</i> ] fluoranthene<br>[µg/kg] | benzo[ <i>k</i> ]fluoranthene<br>[µg/kg] | benzo[ <i>a</i> ]pyrene<br>[µg/kg] | indeno[1,2,3, <i>c,d</i> ] pyrene<br>[µg/kg] | dibenzo[ <i>a,h</i> ]anthracene<br>[µg/kg] | Benzo[ <i>g,h,i</i> ]perylene<br>[µg/kg] | sum 16 PAHs<br>[µg/kg] |
|------|-------------------|-----------------------------------------|---------------------|-------------------------------------------|------------------------------------------|------------------------------------|----------------------------------------------|--------------------------------------------|------------------------------------------|------------------------|
| 1926 | 109               | 55                                      | 83                  | 84                                        | 37                                       | 126                                | 76                                           | 12                                         | 73                                       | 955                    |
| 1923 | 71                | 31                                      | 52                  | 49                                        | 21                                       | 48                                 | 40                                           | 5                                          | 39                                       | 575                    |
| 1919 | n.a.              | n.a.                                    | n.a.                | n.a.                                      | n.a.                                     | n.a.                               | n.a.                                         | n.a.                                       | n.a.                                     | n.a.                   |
| 1915 | 54                | 26                                      | 45                  | 41                                        | 17                                       | 40                                 | 29                                           | 3                                          | 28                                       | 469                    |
| 1912 | 44                | 20                                      | 37                  | 33                                        | 15                                       | 34                                 | 28                                           | 3                                          | 24                                       | 391                    |
| 1908 | 378               | 164                                     | 205                 | 187                                       | 95                                       | 568                                | 186                                          | 29                                         | 173                                      | 3122                   |
| 1908 | 158               | 78                                      | 125                 | 109                                       | 47                                       | 115                                | 69                                           | 9                                          | 70                                       | 1236                   |
| 1906 | 79                | 31                                      | 57                  | 50                                        | 23                                       | 49                                 | 45                                           | 5                                          | 39                                       | 645                    |
| 1903 | 232               | 109                                     | 204                 | 199                                       | 89                                       | 177                                | 118                                          | 22                                         | 118                                      | 1913                   |
| 1899 | 144               | 66                                      | 127                 | 119                                       | 49                                       | 103                                | 70                                           | 14                                         | 73                                       | 1204                   |
| 1895 | 140               | 74                                      | 104                 | 90                                        | 39                                       | 110                                | 62                                           | 8                                          | 62                                       | 1078                   |
| 1888 | 142               | 77                                      | 117                 | 114                                       | 49                                       | 110                                | 79                                           | 11                                         | 75                                       | 1179                   |
| 1884 | 184               | 103                                     | 173                 | 173                                       | 77                                       | 147                                | 107                                          | 19                                         | 116                                      | 1653                   |
| 1881 | 111               | 70                                      | 96                  | 87                                        | 40                                       | 95                                 | 57                                           | 10                                         | 52                                       | 956                    |
| 1877 | 23                | 10                                      | 19                  | 17                                        | 6                                        | 15                                 | 15                                           |                                            | 13                                       | 233                    |
| 1873 | 28                | 12                                      | 19                  | 17                                        | 7                                        | 20                                 | 14                                           |                                            | 12                                       | 264                    |
| 1870 | 28                | 14                                      | 18                  | 14                                        | 7                                        | 15                                 | 10                                           | 1                                          | 14                                       | 248                    |
| 1866 | 165               | 98                                      | 108                 | 79                                        | 43                                       | 102                                | 78                                           | 10                                         | 69                                       | 1237                   |
| 1862 | n.a.              | n.a.                                    | n.a.                | n.a.                                      | n.a.                                     | n.a.                               | n.a.                                         | n.a.                                       | n.a.                                     | n.a.                   |

n.a. = not available

**Table S5.** Total organic carbon, black carbon, and polycyclic aromatic hydrocarbons in dated sediment core TH3 from Lake Thun.

| year | sediment flux<br>[g/m <sup>2</sup> /y] | total<br>organic carbon<br>[mg/g] | black carbon<br>[mg/g] | naphthalene<br>[µg/kg] | acenaphthylene<br>[µg/kg] | acenaphthene<br>[µg/kg] | fluorene<br>[µg/kg] | phenanthrene<br>[µg/kg] | anthracene<br>[µg/kg] | fluoranthene<br>[µg/kg] |
|------|----------------------------------------|-----------------------------------|------------------------|------------------------|---------------------------|-------------------------|---------------------|-------------------------|-----------------------|-------------------------|
| 2005 | 1954                                   | 11.7                              | n.a.                   | 27.53                  | 1.20                      | 5.06                    | 8.87                | 35.73                   | 1.88                  | 36.51                   |
| 2000 | 1917                                   | n.a.                              | n.a.                   | 43.60                  | 1.42                      | 7.84                    | 10.67               | 41.90                   | 2.28                  | 46.86                   |
| 1996 | 2236                                   | 11.1                              | n.a.                   | 31.43                  | 1.32                      | 5.53                    | 9.57                | 41.47                   | 2.16                  | 50.39                   |
| 1993 | 2304                                   | 10.8                              | n.a.                   | 28.29                  | 1.84                      | 3.08                    | 8.16                | 43.03                   | 3.97                  | 64.96                   |
| 1989 | 1921                                   | 11.9                              | n.a.                   | 32.24                  | 1.82                      | 8.85                    | 11.71               | 60.42                   | 4.23                  | 95.21                   |
| 1985 | 2123                                   | 12.3                              | 0.8                    | n.a.                   | n.a.                      | n.a.                    | n.a.                | n.a.                    | n.a.                  | n.a.                    |
| 1982 | 2006                                   | 12.2                              | 0.8                    | 22.35                  | 1.90                      | 5.73                    | 11.03               | 51.25                   | 3.17                  | 86.22                   |
| 1978 | 2028                                   | 12.2                              | 0.8                    | 21.69                  | 3.01                      | 3.97                    | 10.13               | 59.95                   | 6.51                  | 116.40                  |
| 1975 | 2096                                   | 12.0                              | 0.8                    | 24.20                  | 4.64                      | 4.39                    | 10.92               | 70.53                   | 8.54                  | 146.53                  |
| 1971 | 2417                                   | 11.6                              | 0.8                    | 23.30                  | 4.38                      | 4.67                    | 12.32               | 70.52                   | 11.27                 | 157.57                  |
| 1968 | 2252                                   | 11.4                              | 0.9                    | 20.75                  | 4.08                      | 4.91                    | 11.42               | 78.01                   | 8.75                  | 168.52                  |
| 1964 | 2069                                   | 10.6                              | 0.7                    | 27.49                  | 8.69                      | 4.52                    | 16.03               | 119.56                  | 15.73                 | 286.75                  |
| 1960 | 2378                                   | 8.5                               | 0.6                    | 30.23                  | 9.37                      | 6.28                    | 18.26               | 150.61                  | 17.01                 | 306.66                  |
| 1957 | 2296                                   | 7.2                               | 0.7                    | 26.22                  | 10.91                     | 4.44                    | 16.44               | 141.05                  | 16.51                 | 261.16                  |
| 1953 | 2602                                   | 5.6                               | 0.5                    | 24.29                  | 10.94                     | 3.43                    | 16.38               | 125.26                  | 13.21                 | 211.80                  |
| 1950 | 2595                                   | 7.3                               | 0.6                    | 27.11                  | 14.37                     | 2.63                    | 16.84               | 132.56                  | 13.39                 | 215.72                  |
| 1946 | 2372                                   | 7.1                               | 0.7                    | 29.41                  | 12.25                     | 5.24                    | 16.58               | 110.90                  | 12.01                 | 186.11                  |
| 1943 | 2622                                   | 6.4                               | 0.7                    | 27.87                  | 8.04                      | 4.29                    | 15.37               | 106.73                  | 10.51                 | 169.87                  |
| 1939 | 2106                                   | 6.3                               | 0.8                    | 33.14                  | 9.03                      | 3.48                    | 14.05               | 89.25                   | 15.69                 | 150.95                  |

n.a. = not available

**Table S5.** continued.

| year | sediment flux<br>[g/m <sup>2</sup> /y] | total<br>organic carbon<br>[mg/g] | black carbon<br>[mg/g] | naphthalene<br>[μg/kg] | acenaphthylene<br>[μg/kg] | acenaphthene<br>[μg/kg] | fluorene<br>[μg/kg] | phenanthrene<br>[μg/kg] | anthracene<br>[μg/kg] | fluoranthene<br>[μg/kg] |
|------|----------------------------------------|-----------------------------------|------------------------|------------------------|---------------------------|-------------------------|---------------------|-------------------------|-----------------------|-------------------------|
| 1936 | 3047                                   | 6.5                               | 0.5                    | 27.77                  | 3.55                      | 3.76                    | 11.43               | 77.92                   | 8.89                  | 122.38                  |
| 1932 | 2570                                   | 6.5                               | 0.5                    | 27.42                  | 2.95                      | 3.43                    | 9.70                | 64.72                   | 5.41                  | 94.65                   |
| 1928 | 2430                                   | 6.1                               | 0.6                    | 24.30                  | 2.13                      | 2.93                    | 8.59                | 51.45                   | 3.45                  | 69.82                   |
| 1925 | 2876                                   | 6.1                               | 0.6                    | 23.69                  | 3.89                      | 2.54                    | 10.15               | 55.85                   | 6.17                  | 76.30                   |
| 1921 | 2344                                   | 5.3                               | 0.7                    | 27.28                  | 2.66                      | 3.12                    | 10.18               | 63.70                   | 6.31                  | 93.05                   |
| 1918 | 2180                                   | 6.8                               | 0.7                    | 25.08                  | 3.29                      | 4.33                    | 11.17               | 85.59                   | 13.53                 | 150.92                  |
| 1914 | 3280                                   | 6.2                               | 0.6                    | 20.33                  | 1.92                      | 2.48                    | 7.98                | 56.81                   | 5.14                  | 78.51                   |
| 1911 | 2596                                   | 6.3                               | 0.6                    | 20.46                  | 1.55                      | 3.16                    | 8.20                | 60.04                   | 4.90                  | 86.83                   |
| 1907 | 2376                                   | 6.2                               | 0.8                    | 24.20                  | 1.87                      | 4.16                    | 9.19                | 80.80                   | 6.78                  | 116.22                  |
| 1904 | 2951                                   | 5.8                               | 0.7                    | 21.24                  | 2.08                      | 3.65                    | 8.61                | 59.65                   | 4.52                  | 75.44                   |
| 1900 | 2546                                   | 6.1                               | 0.6                    | 19.79                  | 1.83                      | 2.48                    | 7.25                | 43.46                   | 2.45                  | 44.40                   |
| 1896 | 2305                                   | 6.3                               | 0.8                    | 19.38                  | 1.54                      | 2.93                    | 7.73                | 42.39                   | 2.39                  | 37.13                   |
| 1893 | 2302                                   | 5.9                               | 0.8                    | 22.66                  | 1.72                      | 3.26                    | 8.31                | 40.58                   | 1.93                  | 29.62                   |
| 1889 | 3208                                   | 6.7                               | 0.7                    | 18.18                  | 1.68                      | 2.46                    | 6.86                | 33.58                   | 1.95                  | 21.91                   |
| 1886 | 2583                                   | 5.7                               | 0.7                    | 20.97                  | 2.07                      | 2.68                    | 7.38                | 33.44                   | 2.05                  | 19.15                   |
| 1882 | 3148                                   | 6.0                               | 0.6                    | 21.73                  | 2.33                      | 2.74                    | 7.56                | 35.30                   | 1.89                  | 17.49                   |
| 1879 | 3334                                   | 4.6                               | 0.4                    | 23.18                  | 2.05                      | 3.01                    | 7.22                | 31.09                   | 1.51                  | 13.37                   |
| 1875 | 3139                                   | 4.3                               | 0.6                    | 19.47                  | 1.87                      | 2.73                    | 6.44                | 28.35                   | 1.04                  | 13.28                   |
| 1871 | 3935                                   | 4.2                               | 0.7                    | 18.19                  | 1.34                      | 2.57                    | 5.09                | 24.70                   | 0.62                  | 10.81                   |
| 1868 | 3763                                   | 4.0                               | 0.5                    | 17.45                  | 1.26                      | 2.25                    | 4.49                | 21.88                   | 0.41                  | 8.24                    |

**Table S5.**continued.

| year | sediment flux<br>[g/m <sup>2</sup> /y] | total<br>organic carbon<br>[mg/g] | black carbon<br>[mg/g] | naphthalene<br>[μg/kg] | acenaphthylene<br>[μg/kg] | acenaphthene<br>[μg/kg] | fluorene<br>[μg/kg] | phenanthrene<br>[μg/kg] | anthracene<br>[μg/kg] | fluoranthene<br>[μg/kg] |
|------|----------------------------------------|-----------------------------------|------------------------|------------------------|---------------------------|-------------------------|---------------------|-------------------------|-----------------------|-------------------------|
| 1864 | 3421                                   | 4.2                               | 0.5                    | 21.08                  | 1.40                      | 2.68                    | 5.24                | 22.68                   | 0.44                  | 8.39                    |
| 1861 | 3405                                   | 4.3                               | 0.4                    | 19.79                  | 1.64                      | 2.36                    | 4.92                | 21.28                   | 0.53                  | 9.73                    |
| 1857 | 3783                                   | 4.3                               | 0.6                    | 19.18                  | 1.44                      | 2.05                    | 4.00                | 17.57                   | 0.44                  | 8.63                    |
| 1854 | 3551                                   | 4.7                               | 0.7                    | 18.85                  | 1.46                      | 2.17                    | 4.84                | 21.50                   | 0.47                  | 9.91                    |
| 1850 | 3492                                   | 4.7                               | 0.6                    | 21.37                  | 1.44                      | 1.81                    | 4.95                | 18.24                   | 0.51                  | 7.23                    |
| 1847 | 3659                                   | 4.3                               | 0.6                    | 19.66                  | 1.22                      | 2.03                    | 4.79                | 21.35                   | 0.45                  | 10.14                   |
| 1843 | 2690                                   | 4.7                               | 0.5                    | 20.77                  | 1.29                      | 1.93                    | 5.08                | 24.85                   | 0.58                  | 13.60                   |
| 1839 | 3370                                   | 4.7                               | 0.5                    | 18.49                  | 1.27                      | 2.06                    | 5.05                | 24.95                   | 0.66                  | 14.72                   |
| 1836 | 3099                                   | 4.9                               | 0.4                    | 34.00                  | 1.23                      | 3.03                    | 4.27                | 20.86                   | 0.49                  | 11.47                   |
| 1832 | 3066                                   | 4.2                               | 0.6                    | 19.43                  | 1.10                      | 2.04                    | 4.17                | 18.63                   | 0.44                  | 9.63                    |
| 1829 | 3134                                   | 5.8                               | 0.5                    | 16.76                  | 1.09                      | 2.22                    | 5.20                | 22.51                   | 0.55                  | 12.70                   |

**Table S6.** Polycyclic aromatic hydrocarbons in dated sediment core TH3 from Lake Thun.

| year | pyrene<br>[µg/kg] | benzo[ <i>a</i> ] anthracene<br>[µg/kg] | chrysene<br>[µg/kg] | benzo[ <i>b</i> ] fluoranthene<br>[µg/kg] | benzo[ <i>k</i> ]fluoranthene<br>[µg/kg] | benzo[ <i>a</i> ]pyrene<br>[µg/kg] | indeno[1,2,3, <i>c,d</i> ] pyrene<br>[µg/kg] | dibenzo[ <i>a,h</i> ]anthracene<br>[µg/kg] | Benzo[ <i>g,h,i</i> ]perylene<br>[µg/kg] | sum 16 PAHs<br>[µg/kg] |
|------|-------------------|-----------------------------------------|---------------------|-------------------------------------------|------------------------------------------|------------------------------------|----------------------------------------------|--------------------------------------------|------------------------------------------|------------------------|
| 2005 | 24.47             | 9.56                                    | 16.14               | 16.99                                     | 6.11                                     | 10.67                              | 9.91                                         | 0.94                                       | 14.45                                    | 226.03                 |
| 2000 | 31.95             | 11.76                                   | 20.58               | 20.49                                     | 7.68                                     | 12.99                              | 12.67                                        | 1.68                                       | 15.86                                    | 290.21                 |
| 1996 | 33.69             | 12.07                                   | 20.62               | 19.40                                     | 7.49                                     | 11.72                              | 10.37                                        | 1.04                                       | 15.09                                    | 273.38                 |
| 1993 | 45.31             | 17.62                                   | 28.04               | 29.13                                     | 10.99                                    | 22.86                              | 20.78                                        | 3.03                                       | 22.91                                    | 353.99                 |
| 1989 | 66.38             | 25.61                                   | 41.21               | 41.62                                     | 16.93                                    | 31.95                              | 28.00                                        | 2.97                                       | 29.24                                    | 498.37                 |
| 1985 | n.a.              | n.a.                                    | n.a.                | n.a.                                      | n.a.                                     | n.a.                               | n.a.                                         | n.a.                                       | n.a.                                     | n.a.                   |
| 1982 | 56.90             | 27.73                                   | 43.77               | 49.65                                     | 23.40                                    | 31.50                              | 39.72                                        | 5.04                                       | 39.10                                    | 498.46                 |
| 1978 | 78.16             | 40.78                                   | 62.62               | 71.36                                     | 33.88                                    | 47.78                              | 51.48                                        | 4.76                                       | 52.00                                    | 664.46                 |
| 1975 | 97.56             | 51.98                                   | 79.53               | 100.49                                    | 48.05                                    | 69.65                              | 78.95                                        | 6.96                                       | 71.79                                    | 874.71                 |
| 1971 | 101.09            | 55.26                                   | 85.73               | 115.42                                    | 57.27                                    | 82.01                              | 88.83                                        | 10.66                                      | 79.27                                    | 959.55                 |
| 1968 | 105.41            | 59.40                                   | 94.08               | 117.46                                    | 55.76                                    | 73.60                              | 94.73                                        | 8.10                                       | 78.53                                    | 983.50                 |
| 1964 | 161.89            | 86.15                                   | 131.64              | 153.61                                    | 68.97                                    | 100.33                             | 103.93                                       | 15.34                                      | 95.34                                    | 1395.98                |
| 1960 | 192.88            | 105.12                                  | 157.18              | 176.67                                    | 86.75                                    | 127.80                             | 130.07                                       | 23.85                                      | 119.91                                   | 1658.64                |
| 1957 | 164.44            | 90.09                                   | 135.24              | 142.40                                    | 67.19                                    | 108.93                             | 104.43                                       | 14.92                                      | 92.99                                    | 1397.38                |
| 1953 | 116.26            | 58.50                                   | 103.54              | 102.91                                    | 48.76                                    | 68.62                              | 76.03                                        | 11.23                                      | 71.41                                    | 1062.56                |
| 1950 | 132.04            | 61.18                                   | 100.05              | 105.33                                    | 46.91                                    | 81.92                              | 82.25                                        | 13.46                                      | 68.77                                    | 1114.53                |
| 1946 | 109.56            | 54.26                                   | 86.42               | 92.98                                     | 42.18                                    | 64.25                              | 58.83                                        | 7.88                                       | 60.24                                    | 949.09                 |
| 1943 | 98.81             | 49.35                                   | 75.13               | 79.84                                     | 38.13                                    | 56.44                              | 56.05                                        | 6.52                                       | 54.53                                    | 857.47                 |
| 1939 | 87.62             | 44.38                                   | 67.99               | 73.11                                     | 32.90                                    | 54.30                              | 56.67                                        | 6.45                                       | 53.49                                    | 792.50                 |

n.a. = not available

**Table S6.** continued.

| year | pyrene<br>[µg/kg] | benzo[ <i>a</i> ] anthracene<br>[µg/kg] | chrysene<br>[µg/kg] | benzo[ <i>b</i> ] fluoranthene<br>[µg/kg] | benzo[ <i>k</i> ]fluoranthene<br>[µg/kg] | benzo[ <i>a</i> ]pyrene<br>[µg/kg] | indeno[1,2,3, <i>c,d</i> ] pyrene<br>[µg/kg] | dibenzo[ <i>a,h</i> ]anthracene<br>[µg/kg] | Benzo[ <i>g,h,i</i> ]perylene<br>[µg/kg] | sum 16 PAHs<br>[µg/kg] |
|------|-------------------|-----------------------------------------|---------------------|-------------------------------------------|------------------------------------------|------------------------------------|----------------------------------------------|--------------------------------------------|------------------------------------------|------------------------|
| 1936 | 69.27             | 34.14                                   | 52.38               | 55.16                                     | 24.86                                    | 29.71                              | 37.60                                        | 2.57                                       | 38.06                                    | 599.45                 |
| 1932 | 51.19             | 22.82                                   | 39.00               | 40.40                                     | 22.46                                    | 20.47                              | 28.31                                        | 1.72                                       | 24.59                                    | 459.23                 |
| 1928 | 35.42             | 15.97                                   | 28.94               | 29.31                                     | 15.89                                    | 12.49                              | 20.66                                        | 0.00                                       | 14.14                                    | 335.49                 |
| 1925 | 40.10             | 18.69                                   | 31.37               | 33.96                                     | 17.78                                    | 16.50                              | 29.02                                        | 0.00                                       | 21.36                                    | 387.38                 |
| 1921 | 45.89             | 25.01                                   | 39.19               | 39.16                                     | 17.32                                    | 18.87                              | 24.27                                        | 1.79                                       | 25.49                                    | 443.28                 |
| 1918 | 94.50             | 52.52                                   | 62.58               | 65.22                                     | 33.38                                    | 43.25                              | 48.03                                        | 3.82                                       | 38.26                                    | 735.45                 |
| 1914 | 36.17             | 17.62                                   | 30.10               | 32.87                                     | 15.24                                    | 17.15                              | 30.01                                        | 1.51                                       | 24.29                                    | 378.14                 |
| 1911 | 41.52             | 20.57                                   | 32.04               | 36.50                                     | 16.49                                    | 18.77                              | 31.40                                        | 2.24                                       | 27.07                                    | 411.74                 |
| 1907 | 63.09             | 36.14                                   | 47.37               | 49.29                                     | 53.50                                    | 27.82                              | 40.34                                        | 2.77                                       | 32.25                                    | 595.80                 |
| 1904 | 39.00             | 18.94                                   | 29.00               | 30.15                                     | 15.76                                    | 15.03                              | 25.69                                        | 1.40                                       | 18.75                                    | 368.91                 |
| 1900 | 18.48             | 7.71                                    | 16.54               | 15.62                                     | 6.26                                     | 4.66                               | 7.41                                         | 0.45                                       | 8.81                                     | 207.60                 |
| 1896 | 16.24             | 6.80                                    | 14.83               | 13.39                                     | 17.31                                    | 5.47                               | 11.64                                        | 0.93                                       | 12.51                                    | 212.61                 |
| 1893 | 12.99             | 5.39                                    | 12.21               | 10.95                                     | 4.95                                     | 2.72                               | 6.39                                         | n.a.                                       | 9.69                                     | 173.38                 |
| 1889 | 10.68             | 4.03                                    | 9.52                | 7.67                                      | 3.05                                     | 3.83                               | 5.59                                         | n.a.                                       | 6.90                                     | 137.89                 |
| 1886 | 10.56             | 2.97                                    | 7.72                | 5.57                                      | 2.23                                     | 2.97                               | 3.90                                         | n.a.                                       | 5.76                                     | 129.42                 |
| 1882 | 10.51             | 3.08                                    | 7.83                | 5.12                                      | 2.86                                     | 2.00                               | n.a.                                         | n.a.                                       | 4.34                                     | 124.77                 |
| 1879 | 8.63              | 2.50                                    | 7.25                | 5.36                                      | 1.40                                     | 2.55                               | n.a.                                         | n.a.                                       | 6.35                                     | 115.45                 |
| 1875 | 7.05              | 1.94                                    | 6.02                | 4.10                                      | 1.33                                     | 1.66                               | n.a.                                         | n.a.                                       | 4.31                                     | 99.59                  |
| 1871 | 5.78              | 1.73                                    | 5.33                | 3.96                                      | 1.12                                     | 1.36                               | n.a.                                         | n.a.                                       | 3.76                                     | 86.36                  |
| 1868 | 5.11              | 1.16                                    | 4.08                | 2.69                                      | 0.81                                     | 1.10                               | n.a.                                         | n.a.                                       | 2.84                                     | 73.75                  |

n.a. = not available



**Table S6.** continued.

| year | pyrene<br>[µg/kg] | benzo[ <i>a</i> ]anthracene<br>[µg/kg] | chrysene<br>[µg/kg] | benzo[ <i>b</i> ]fluoranthene<br>[µg/kg] | benzo[ <i>k</i> ]fluoranthene<br>[µg/kg] | benzo[ <i>a</i> ]pyrene<br>[µg/kg] | indeno[1,2,3, <i>c,d</i> ]pyrene<br>[µg/kg] | dibenzo[ <i>a,h</i> ]anthracene<br>[µg/kg] | Benzo[ <i>g,h,i</i> ]perylene<br>[µg/kg] | sum 16 PAHs<br>[µg/kg] |
|------|-------------------|----------------------------------------|---------------------|------------------------------------------|------------------------------------------|------------------------------------|---------------------------------------------|--------------------------------------------|------------------------------------------|------------------------|
| 1864 | 5.07              | 1.47                                   | 4.27                | 3.07                                     | 1.09                                     | 1.28                               | n.a.                                        | n.a.                                       | 2.94                                     | 81.10                  |
| 1861 | 5.11              | 1.31                                   | 4.07                | 2.59                                     | 1.00                                     | 0.84                               | n.a.                                        | n.a.                                       | 2.40                                     | 77.57                  |
| 1857 | 4.64              | 1.37                                   | 3.95                | 2.90                                     | 0.84                                     | 1.34                               | n.a.                                        | n.a.                                       | 2.59                                     | 70.95                  |
| 1854 | 6.23              | 1.46                                   | 5.27                | 3.81                                     | 1.41                                     | 0.81                               | n.a.                                        | n.a.                                       | 3.77                                     | 81.96                  |
| 1850 | 4.45              | 1.00                                   | 3.96                | 2.38                                     | 1.09                                     | 0.57                               | n.a.                                        | n.a.                                       | 1.84                                     | 70.85                  |
| 1847 | 5.34              | 1.37                                   | 5.11                | 3.23                                     | 1.12                                     | 0.69                               | n.a.                                        | n.a.                                       | 2.49                                     | 78.99                  |
| 1843 | 6.74              | 1.90                                   | 5.97                | 4.69                                     | 1.60                                     | 1.33                               | n.a.                                        | n.a.                                       | 4.15                                     | 94.45                  |
| 1839 | 6.94              | 2.11                                   | 6.15                | 4.72                                     | 2.36                                     | 1.08                               | n.a.                                        | n.a.                                       | 4.21                                     | 94.78                  |
| 1836 | 5.90              | 1.41                                   | 4.68                | 3.07                                     | 1.25                                     | 0.57                               | n.a.                                        | n.a.                                       | 2.24                                     | 94.48                  |
| 1832 | 5.26              | 1.27                                   | 4.47                | 3.20                                     | 1.28                                     | 0.67                               | n.a.                                        | n.a.                                       | 3.39                                     | 74.98                  |
| 1829 | 6.51              | 1.77                                   | 5.41                | 3.85                                     | 1.28                                     | 0.85                               | n.a.                                        | n.a.                                       | 3.11                                     | 83.82                  |

n.a. = not available

**Table S7.** Total organic carbon, black carbon, and polycyclic aromatic hydrocarbons in dated sediment core from Lake Engstlen.

| year | sediment flux<br>[g/m <sup>2</sup> /y] | total<br>organic carbon<br>[mg/g] | black carbon<br>[mg/g] | naphthalene<br>[μg/kg] | acenaphthylene<br>[μg/kg] | acenaphthene<br>[μg/kg] | fluorene<br>[μg/kg] | phenanthrene<br>[μg/kg] | anthracene<br>[μg/kg] | fluoranthene<br>[μg/kg] |
|------|----------------------------------------|-----------------------------------|------------------------|------------------------|---------------------------|-------------------------|---------------------|-------------------------|-----------------------|-------------------------|
| 2007 | 1239                                   | 15.2                              | 1.5                    | 10.20                  | 0.48                      | 1.44                    | 2.85                | 22.08                   | 1.06                  | 25.52                   |
| 2002 | 1042                                   | 13.2                              | 1.8                    | 9.09                   | 0.36                      | 1.16                    | 2.57                | 19.53                   | 0.80                  | 19.29                   |
| 1997 | 1093                                   | 24.5                              | 2.6                    | 8.73                   | 0.56                      | 1.06                    | 2.56                | 19.96                   | 1.00                  | 27.13                   |
| 1992 | 976                                    | 29.5                              | 2.2                    | 8.09                   | 0.42                      | 1.16                    | 2.59                | 20.04                   | 1.09                  | 27.65                   |
| 1987 | 1338                                   | 24.6                              | 2.7                    | 6.10                   | 0.55                      | 0.75                    | 2.03                | 16.50                   | 0.97                  | 27.36                   |
| 1982 | 1540                                   | 16.8                              | 3.0                    | 8.09                   | 0.55                      | 1.20                    | 2.60                | 21.32                   | 1.08                  | 30.38                   |
| 1977 | 1988                                   | 13.1                              | 3.3                    | 7.58                   | 0.38                      | 1.10                    | 2.44                | 20.78                   | 1.42                  | 27.99                   |
| 1972 | 2182                                   | 12.2                              | 3.1                    | 11.24                  | 0.59                      | 1.41                    | 2.52                | 18.47                   | 1.07                  | 31.87                   |
| 1967 | 1567                                   | 10.0                              | 3.2                    | 26.70                  | 0.66                      | 2.01                    | 3.05                | 17.38                   | 1.00                  | 23.33                   |
| 1964 | 2579                                   | 21.0                              | 2.9                    | 17.79                  | 0.95                      | 2.16                    | 3.47                | 24.44                   | 1.38                  | 37.69                   |

**Table S7.** continued.

| year | pyrene<br>[µg/kg] | benzo[ <i>a</i> ] anthracene<br>[µg/kg] | chrysene<br>[µg/kg] | benzo[ <i>b</i> ] fluoranthene<br>[µg/kg] | benzo[ <i>k</i> ]fluoranthene<br>[µg/kg] | benzo[ <i>a</i> ]pyrene<br>[µg/kg] | indeno[1,2,3, <i>c,d</i> ] pyrene<br>[µg/kg] | dibenzo[ <i>a,h</i> ]anthracene<br>[µg/kg] | Benzo[ <i>g,h,i</i> ]perylene<br>[µg/kg] | sum 16 PAHs<br>[µg/kg] |
|------|-------------------|-----------------------------------------|---------------------|-------------------------------------------|------------------------------------------|------------------------------------|----------------------------------------------|--------------------------------------------|------------------------------------------|------------------------|
| 2007 | 14.11             | 6.85                                    | 21.65               | 28.84                                     | 9.51                                     | 5.01                               | 15.51                                        | 1.77                                       | 10.58                                    | 177.45                 |
| 2002 | 10.54             | 5.14                                    | 14.60               | 21.30                                     | 7.14                                     | 4.82                               | 12.86                                        | 1.34                                       | 9.28                                     | 139.82                 |
| 1997 | 14.82             | 7.14                                    | 19.38               | 29.57                                     | 10.05                                    | 8.01                               | 20.68                                        | 2.35                                       | 12.96                                    | 185.98                 |
| 1992 | 14.05             | 6.97                                    | 17.59               | 29.49                                     | 10.33                                    | 8.54                               | 25.08                                        | 2.91                                       | 13.83                                    | 189.82                 |
| 1987 | 13.85             | 7.22                                    | 19.27               | 29.27                                     | 10.19                                    | 6.72                               | 17.15                                        | 2.04                                       | 10.20                                    | 170.19                 |
| 1982 | 15.25             | 7.50                                    | 18.13               | 27.13                                     | 9.61                                     | 7.95                               | 21.13                                        | 2.80                                       | 12.88                                    | 187.60                 |
| 1977 | 15.02             | 8.73                                    | 18.00               | 25.96                                     | 9.60                                     | 8.01                               | 19.51                                        | 2.98                                       | 12.53                                    | 182.05                 |
| 1972 | 17.02             | 7.89                                    | 23.46               | 33.64                                     | 10.84                                    | 6.60                               | 17.18                                        | 1.52                                       | 16.52                                    | 201.86                 |
| 1967 | 12.54             | 5.90                                    | 15.79               | 24.84                                     | 8.27                                     | 4.95                               | 12.72                                        | 1.18                                       | 14.31                                    | 174.63                 |
| 1964 | 19.52             | 9.18                                    | 24.51               | 40.92                                     | 13.37                                    | 5.44                               | 24.01                                        | 2.08                                       | 18.06                                    | 244.96                 |

**Table S8.** Total organic carbon, black carbon, and polycyclic aromatic hydrocarbons in dated sediment core from Lake Oberaar.

| year | sediment flux<br>[g/m <sup>2</sup> /y] | total<br>organic carbon<br>[mg/g] | black carbon<br>[mg/g] | naphthalene<br>[µg/kg] | acenaphthylene<br>[µg/kg] | acenaphthene<br>[µg/kg] | fluorene<br>[µg/kg] | phenanthrene<br>[µg/kg] | anthracene<br>[µg/kg] | fluoranthene<br>[µg/kg] |
|------|----------------------------------------|-----------------------------------|------------------------|------------------------|---------------------------|-------------------------|---------------------|-------------------------|-----------------------|-------------------------|
| 2004 | 30020                                  | 1.5                               | 0.3                    | 9.80                   | 0.15                      | 0.96                    | 0.68                | 4.71                    | 0.08                  | 2.94                    |
| 2001 | 28380                                  | 1.3                               | 0.2                    | 9.77                   | 0.13                      | 1.02                    | 0.95                | 6.09                    | 0.11                  | 2.46                    |
| 2001 | 28381                                  | n.a.                              | n.a.                   | 8.65                   | 0.10                      | 1.07                    | 1.15                | 8.03                    | 0.18                  | 2.83                    |
| 2001 | 28382                                  | n.a.                              | n.a.                   | 12.27                  | 0.11                      | 0.86                    | 0.77                | 4.48                    | 0.08                  | 2.32                    |
| 2001 | 28383                                  | n.a.                              | n.a.                   | 7.15                   | 0.10                      | 0.73                    | 0.90                | 6.76                    | 0.11                  | 3.08                    |
| 1997 | 34507                                  | 1.5                               | 0.3                    | 5.21                   | 0.09                      | 0.53                    | 0.52                | 3.38                    | 0.05                  | 2.09                    |
| 1992 | 11841                                  | 1.4                               | 0.3                    | 5.46                   | 0.16                      | 0.56                    | 0.66                | 4.90                    | 0.09                  | 3.08                    |
| 1987 | 12071                                  | 1.1                               | 0.3                    | 5.79                   | 0.25                      | 0.65                    | 0.87                | 8.99                    | 0.22                  | 7.41                    |
| 1987 | 12072                                  | n.a.                              | n.a.                   | 8.34                   | 0.15                      | 0.32                    | 0.41                | 2.40                    | 0.05                  | 2.93                    |
| 1982 | 11291                                  | 1.3                               | 0.3                    | 5.78                   | 0.23                      | 0.54                    | 0.48                | 3.71                    | 0.10                  | 3.70                    |
| 1977 | 11344                                  | 1.1                               | 0.3                    | 8.20                   | 0.30                      | 0.37                    | 0.45                | 3.92                    | 0.11                  | 9.11                    |
| 1972 | 16460                                  | 1.1                               | 0.3                    | 5.76                   | 0.21                      | 0.57                    | 0.65                | 4.87                    | 0.16                  | 4.68                    |
| 1967 | 16460                                  | 1.1                               | 0.3                    | 5.45                   | 0.25                      | 0.56                    | 0.55                | 4.19                    | 0.33                  | 4.64                    |
| 1967 | 16461                                  | n.a.                              | n.a.                   | 7.81                   | 0.18                      | 0.31                    | 0.42                | 2.46                    | 0.08                  | 3.71                    |
| 1961 | 19797                                  | 0.9                               | 0.3                    | 4.90                   | 0.28                      | 0.62                    | 0.75                | 5.75                    | 0.00                  | 7.30                    |
| 1956 | 14825                                  | 0.8                               | 0.3                    | 7.96                   | 0.28                      | 0.70                    | 0.65                | 4.74                    | 0.26                  | 5.56                    |

n.a. = not available

**Table S8.** continued.

| year | pyrene<br>[µg/kg] | benzo[ <i>a</i> ] anthracene<br>[µg/kg] | chrysene<br>[µg/kg] | benzo[ <i>b</i> ] fluoranthene<br>[µg/kg] | benzo[ <i>k</i> ]fluoranthene<br>[µg/kg] | benzo[ <i>a</i> ]pyrene<br>[µg/kg] | indeno[1,2,3, <i>c,d</i> ] pyrene<br>[µg/kg] | dibenzo[ <i>a,h</i> ]anthracene<br>[µg/kg] | Benzo[ <i>g,h,i</i> ]perylene<br>[µg/kg] | sum 16 PAHs<br>[µg/kg] |
|------|-------------------|-----------------------------------------|---------------------|-------------------------------------------|------------------------------------------|------------------------------------|----------------------------------------------|--------------------------------------------|------------------------------------------|------------------------|
| 2004 | 1.68              | 0.73                                    | 1.63                | 2.29                                      | 0.68                                     | 0.05                               | 0.48                                         | 0.00                                       | 0.38                                     | 27.23                  |
| 2001 | 1.74              | 0.70                                    | 1.54                | 2.24                                      | 0.68                                     | 0.13                               | 0.77                                         | 0.00                                       | 0.65                                     | 28.99                  |
| 2001 | 1.85              | 0.64                                    | 1.45                | 2.07                                      | 0.60                                     | 0.24                               | 1.04                                         | 0.11                                       | 0.90                                     | 30.89                  |
| 2001 | 1.48              | 0.53                                    | 1.38                | 2.04                                      | 0.66                                     | 0.00                               | 0.56                                         | 0.00                                       | 0.00                                     | 27.54                  |
| 2001 | 1.96              | 0.96                                    | 2.09                | 2.97                                      | 0.95                                     | 2.12                               | 0.62                                         | 0.00                                       | 0.62                                     | 31.12                  |
| 1997 | 1.06              | 0.47                                    | 1.36                | 1.93                                      | 0.56                                     | 0.00                               | 0.31                                         | 0.00                                       | 0.00                                     | 17.57                  |
| 1992 | 1.57              | 0.63                                    | 2.43                | 3.21                                      | 0.96                                     | 0.00                               | 0.00                                         | 0.00                                       | 0.00                                     | 23.72                  |
| 1987 | 3.94              | 1.69                                    | 5.27                | 7.59                                      | 2.42                                     | 5.34                               | 3.26                                         | 0.34                                       | 1.27                                     | 55.30                  |
| 1987 | 1.76              | 0.64                                    | 2.08                | 2.29                                      | 0.77                                     | 1.90                               | 0.48                                         | 0.00                                       | 0.40                                     | 24.89                  |
| 1982 | 1.89              | 0.87                                    | 2.51                | 3.75                                      | 1.17                                     | 0.00                               | 0.34                                         | 0.00                                       | 0.00                                     | 25.07                  |
| 1977 | 6.16              | 3.13                                    | 5.44                | 5.68                                      | 2.37                                     | 5.33                               | 1.61                                         | 0.00                                       | 1.30                                     | 53.46                  |
| 1972 | 2.91              | 1.38                                    | 3.34                | 4.44                                      | 1.52                                     | 0.00                               | 0.43                                         | 0.00                                       | 0.29                                     | 31.21                  |
| 1967 | 1.77              | 1.08                                    | 3.57                | 5.24                                      | 1.78                                     | 0.00                               | 2.26                                         | 0.00                                       | 0.00                                     | 31.67                  |
| 1967 | 2.30              | 1.01                                    | 3.02                | 3.38                                      | 1.26                                     | 3.25                               | 0.83                                         | 0.00                                       | 0.54                                     | 30.57                  |
| 1961 | 4.64              | 2.28                                    | 5.90                | 8.29                                      | 2.86                                     | 8.80                               | 3.22                                         | 0.00                                       | 1.43                                     | 57.00                  |
| 1956 | 3.62              | 2.17                                    | 3.42                | 4.65                                      | 1.87                                     | 0.00                               | 1.08                                         | 0.00                                       | 3.23                                     | 40.19                  |

**Table S9.** Total organic carbon, black carbon, and polycyclic aromatic hydrocarbons in dated sediment core from Lake Stein.

| year | sediment flux<br>[g/m <sup>2</sup> /y] | total<br>organic carbon<br>[mg/g] | black carbon<br>[mg/g] | naphthalene<br>[µg/kg] | acenaphthylene<br>[µg/kg] | acenaphthene<br>[µg/kg] | fluorene<br>[µg/kg] | phenanthrene<br>[µg/kg] | anthracene<br>[µg/kg] | fluoranthene<br>[µg/kg] |
|------|----------------------------------------|-----------------------------------|------------------------|------------------------|---------------------------|-------------------------|---------------------|-------------------------|-----------------------|-------------------------|
| 2008 | 70242                                  | 3.3                               | 2.1                    | 8.30                   | 0.13                      | 1.18                    | 1.23                | 7.70                    | 0.19                  | 4.81                    |
| 2006 | 64672                                  | 4.1                               | 2.6                    | 8.97                   | 0.16                      | 1.11                    | 1.33                | 8.73                    | 0.26                  | 6.82                    |
| 2004 | 71391                                  | 4.4                               | 3.0                    | 7.73                   | 0.17                      | 1.01                    | 1.13                | 7.54                    | 0.00                  | 7.18                    |
| 2001 | 31495                                  | 3.7                               | 2.6                    | 8.85                   | 0.12                      | 0.77                    | 0.95                | 4.60                    | 0.09                  | 4.71                    |
| 1999 | 75156                                  | 2.4                               | 2.0                    | 6.28                   | 0.11                      | 0.80                    | 1.01                | 6.73                    | 0.15                  | 4.61                    |
| 1997 | 94359                                  | 2.8                               | 2.4                    | 7.91                   | 0.12                      | 0.75                    | 0.88                | 4.61                    | 0.10                  | 5.47                    |
| 1995 | 82816                                  | 2.7                               | 1.8                    | 7.32                   | 0.10                      | 0.74                    | 0.74                | 4.01                    | 0.08                  | 4.61                    |
| 1994 | 54045                                  | 2.2                               | 1.8                    | 6.91                   | 0.11                      | 0.68                    | 0.75                | 3.98                    | 0.05                  | 4.64                    |
| 1992 | 107962                                 | 2.1                               | 2.0                    | 6.92                   | 0.16                      | 0.65                    | 0.78                | 5.51                    | 0.15                  | 7.04                    |
| 1990 | 74097                                  | 1.7                               | 1.2                    | 5.92                   | 0.10                      | 0.88                    | 1.11                | 7.96                    | 0.18                  | 4.77                    |
| 1989 | 97699                                  | 2.0                               | 1.9                    | 5.24                   | 0.10                      | 0.50                    | 0.64                | 4.13                    | 0.09                  | 4.67                    |
| 1987 | 106341                                 | 2.1                               | 2.1                    | 5.68                   | 0.10                      | 0.52                    | 0.74                | 5.38                    | 0.15                  | 5.38                    |
| 1984 | 55447                                  | 2.7                               | 2.7                    | 6.31                   | 0.15                      | 1.00                    | 1.21                | 8.71                    | 0.22                  | 7.01                    |
| 1982 | 88354                                  | 2.5                               | 2.5                    | 6.28                   | 0.15                      | 0.63                    | 0.76                | 4.94                    | 0.16                  | 6.33                    |
| 1980 | 85491                                  | 2.7                               | 2.2                    | 6.66                   | 0.16                      | 0.60                    | 0.89                | 6.01                    | 0.17                  | 8.04                    |
| 1977 | 55545                                  | 2.9                               | 2.6                    | 6.60                   | 0.14                      | 0.78                    | 0.92                | 5.74                    | 0.17                  | 6.77                    |
| 1975 | 71233                                  | 2.6                               | 2.6                    | 6.59                   | 0.17                      | 0.55                    | 0.94                | 6.68                    | 0.19                  | 9.15                    |
| 1973 | 61139                                  | 2.2                               | 1.9                    | 5.65                   | 0.20                      | 0.64                    | 0.96                | 6.42                    | 0.13                  | 4.84                    |
| 1969 | 55876                                  | 2.3                               | 1.9                    | 5.63                   | 0.24                      | 0.40                    | 0.85                | 5.74                    | 0.07                  | 8.53                    |
| 1966 | 33067                                  | 2.6                               | 2.6                    | 7.50                   | 0.83                      | 0.49                    | 1.30                | 10.26                   | 0.20                  | 13.15                   |
| 1961 | 52218                                  | 2.2                               | 1.4                    | 6.72                   | 0.45                      | 0.91                    | 1.33                | 10.08                   | 0.14                  | 8.61                    |

**Table S9.** continued.

| year | pyrene<br>[ $\mu\text{g}/\text{kg}$ ] | benzo[ <i>a</i> ] anthracene<br>[ $\mu\text{g}/\text{kg}$ ] | chrysene<br>[ $\mu\text{g}/\text{kg}$ ] | benzo[ <i>b</i> ] fluoranthene<br>[ $\mu\text{g}/\text{kg}$ ] | benzo[ <i>k</i> ]fluoranthene<br>[ $\mu\text{g}/\text{kg}$ ] | benzo[ <i>a</i> ]pyrene<br>[ $\mu\text{g}/\text{kg}$ ] | indeno[1,2,3- <i>c,d</i> ] pyrene<br>[ $\mu\text{g}/\text{kg}$ ] | dibenzo[ <i>a,h</i> ]anthracene<br>[ $\mu\text{g}/\text{kg}$ ] | Benzo[ <i>g,h,i</i> ]perylene<br>[ $\mu\text{g}/\text{kg}$ ] | sum 16 PAHs<br>[ $\mu\text{g}/\text{kg}$ ] |
|------|---------------------------------------|-------------------------------------------------------------|-----------------------------------------|---------------------------------------------------------------|--------------------------------------------------------------|--------------------------------------------------------|------------------------------------------------------------------|----------------------------------------------------------------|--------------------------------------------------------------|--------------------------------------------|
| 2008 | 2.78                                  | 0.77                                                        | 2.73                                    | 3.54                                                          | 0.88                                                         | 0.51                                                   | 0.78                                                             | 0.00                                                           | 1.33                                                         | 36.87                                      |
| 2006 | 3.74                                  | 1.16                                                        | 4.33                                    | 6.01                                                          | 1.46                                                         | 0.72                                                   | 1.71                                                             | 0.00                                                           | 2.18                                                         | 48.68                                      |
| 2004 | 3.87                                  | 1.25                                                        | 4.94                                    | 6.82                                                          | 1.66                                                         | 0.99                                                   | 2.12                                                             | 0.00                                                           | 2.56                                                         | 48.98                                      |
| 2001 | 2.45                                  | 0.74                                                        | 3.39                                    | 2.90                                                          | 1.33                                                         | 2.17                                                   | 0.00                                                             | 0.00                                                           | 0.46                                                         | 31.07                                      |
| 1999 | 2.62                                  | 0.74                                                        | 2.73                                    | 3.18                                                          | 0.80                                                         | 0.38                                                   | 0.76                                                             | 0.00                                                           | 1.09                                                         | 31.98                                      |
| 1997 | 2.81                                  | 1.18                                                        | 4.94                                    | 4.30                                                          | 1.92                                                         | 0.25                                                   | 0.00                                                             | 0.00                                                           | 0.61                                                         | 35.87                                      |
| 1995 | 2.38                                  | 0.72                                                        | 3.27                                    | 2.56                                                          | 0.99                                                         | 2.04                                                   | 0.00                                                             | 0.00                                                           | 0.35                                                         | 29.92                                      |
| 1994 | 2.46                                  | 0.82                                                        | 3.62                                    | 3.06                                                          | 1.19                                                         | 0.16                                                   | 0.00                                                             | 0.00                                                           | 0.31                                                         | 28.74                                      |
| 1992 | 3.57                                  | 1.27                                                        | 5.97                                    | 5.00                                                          | 1.93                                                         | 0.18                                                   | 0.86                                                             | 0.00                                                           | 0.48                                                         | 40.47                                      |
| 1990 | 2.68                                  | 0.83                                                        | 3.07                                    | 3.93                                                          | 1.00                                                         | 0.51                                                   | 1.17                                                             | 0.17                                                           | 1.56                                                         | 35.84                                      |
| 1989 | 2.56                                  | 1.07                                                        | 4.16                                    | 4.49                                                          | 1.54                                                         | 0.33                                                   | 1.27                                                             | 0.00                                                           | 0.64                                                         | 31.42                                      |
| 1987 | 2.96                                  | 1.08                                                        | 4.63                                    | 5.18                                                          | 1.75                                                         | 0.38                                                   | 1.11                                                             | 0.00                                                           | 1.21                                                         | 36.27                                      |
| 1984 | 3.63                                  | 1.02                                                        | 4.07                                    | 5.33                                                          | 1.26                                                         | 0.61                                                   | 1.63                                                             | 0.16                                                           | 1.92                                                         | 44.24                                      |
| 1982 | 3.47                                  | 1.32                                                        | 5.60                                    | 5.49                                                          | 1.97                                                         | 0.15                                                   | 0.00                                                             | 0.00                                                           | 0.79                                                         | 38.03                                      |
| 1980 | 4.13                                  | 1.44                                                        | 6.30                                    | 5.82                                                          | 1.96                                                         | 0.19                                                   | 0.00                                                             | 0.00                                                           | 0.67                                                         | 43.06                                      |
| 1977 | 3.50                                  | 1.03                                                        | 4.21                                    | 4.53                                                          | 1.20                                                         | 0.38                                                   | 0.85                                                             | 0.17                                                           | 1.11                                                         | 38.10                                      |
| 1975 | 4.43                                  | 1.55                                                        | 7.63                                    | 6.65                                                          | 2.55                                                         | 0.18                                                   | 0.00                                                             | 0.00                                                           | 0.92                                                         | 48.19                                      |
| 1973 | 2.13                                  | 0.57                                                        | 2.70                                    | 2.79                                                          | 0.66                                                         | 0.08                                                   | 0.26                                                             | 0.00                                                           | 0.15                                                         | 28.18                                      |
| 1969 | 2.18                                  | 0.75                                                        | 7.40                                    | 5.56                                                          | 1.21                                                         | 0.26                                                   | 0.00                                                             | 0.00                                                           | 0.29                                                         | 39.10                                      |
| 1966 | 3.49                                  | 0.60                                                        | 7.13                                    | 6.14                                                          | 0.88                                                         | 0.08                                                   | 0.14                                                             | 0.00                                                           | 0.12                                                         | 52.33                                      |
| 1961 | 3.00                                  | 0.77                                                        | 4.76                                    | 3.81                                                          | 0.76                                                         | 0.03                                                   | 0.24                                                             | 0.09                                                           | 0.31                                                         | 42.02                                      |

**Table S10.** Polycyclic aromatic hydrocarbons in blank samples based on a typical sample amount.

| sample      | naphthalene<br>[µg/kg] | acenaphthylene<br>[µg/kg] | acenaphthene<br>[µg/kg] | fluorene<br>[µg/kg] | phenanthrene<br>[µg/kg] | anthracene<br>[µg/kg] | fluoranthene<br>[µg/kg] | pyrene<br>[µg/kg] | benzo[ <i>a</i> ]<br>anthracene [µg/kg] | chrysene<br>[µg/kg] |
|-------------|------------------------|---------------------------|-------------------------|---------------------|-------------------------|-----------------------|-------------------------|-------------------|-----------------------------------------|---------------------|
| blank TH1-1 | 2.18                   | <0.01                     | 0.55                    | 0.27                | 1.16                    | <0.01                 | 1.07                    | 2.25              | <0.01                                   | <0.01               |
| blank TH1-2 | 2.33                   | <0.01                     | 0.78                    | 0.46                | 1.66                    | <0.01                 | 0.62                    | 0.45              | <0.01                                   | <0.01               |
| blank TH1-3 | 2.18                   | 0.11                      | 0.59                    | 0.30                | 1.06                    | <0.01                 | 0.27                    | <0.01             | <0.01                                   | <0.01               |
| blank TH1-4 | 6.30                   | 0.26                      | 1.20                    | 0.96                | 2.59                    | <0.01                 | 0.65                    | 0.56              | <0.01                                   | <0.01               |
| blank TH2-1 | 6.30                   | 0.26                      | 1.20                    | 0.96                | 2.59                    | <0.01                 | 0.65                    | 0.56              | <0.01                                   | <0.01               |
| blank TH2-2 | 3.45                   | 0.13                      | 0.41                    | 0.32                | 1.49                    | <0.01                 | 0.52                    | <0.01             | <0.01                                   | <0.01               |
| blank TH2-3 | 2.84                   | 0.09                      | 0.36                    | 0.27                | 1.48                    | <0.01                 | 0.65                    | 0.75              | <0.01                                   | <0.01               |
| blank TH2-4 | 2.29                   | 0.06                      | 0.38                    | 0.23                | 1.06                    | <0.01                 | 0.55                    | 0.73              | 0.39                                    | <0.01               |
| blank TH3-1 | 14.07                  | 0.17                      | 2.31                    | 1.17                | 2.83                    | <0.01                 | 0.65                    | <0.01             | 0.55                                    | 0.20                |
| blank TH3-2 | 22.43                  | <0.01                     | 2.42                    | 1.70                | 3.45                    | <0.01                 | 1.16                    | <0.01             | <0.01                                   | <0.01               |
| blank TH3-3 | 7.06                   | <0.01                     | 0.64                    | 0.38                | 1.45                    | <0.01                 | 0.45                    | <0.01             | <0.01                                   | <0.01               |
| blank TH3-4 | 4.31                   | <0.01                     | 0.87                    | 0.63                | 1.82                    | <0.01                 | 0.43                    | <0.01             | <0.01                                   | <0.01               |
| blank TH3-5 | 4.05                   | 0.14                      | 1.18                    | 0.70                | 2.23                    | <0.01                 | 0.55                    | <0.01             | <0.01                                   | <0.01               |
| blank TH3-6 | 4.57                   | 0.13                      | 0.76                    | 0.46                | 2.13                    | <0.01                 | 1.10                    | 1.46              | 0.78                                    | <0.01               |
| blank ENG   | 9.22                   | 0.05                      | 0.30                    | 0.30                | 0.47                    | 0.01                  | 0.17                    | 0.15              | <0.01                                   | <0.01               |
| blank OAR-1 | 4.59                   | 0.04                      | 0.41                    | 0.60                | 4.40                    | 0.10                  | 0.70                    | 0.65              | <0.01                                   | <0.01               |
| blank OAR-2 | 4.48                   | <0.01                     | 0.37                    | 0.27                | 0.89                    | <0.01                 | 0.19                    | 0.10              | 0.12                                    | 0.17                |
| blank ST    | 4.73                   | 0.03                      | 0.53                    | 0.57                | 3.69                    | 0.08                  | 0.67                    | 0.58              | 0.16                                    | 0.09                |



**Table S11.** Polycyclic aromatic hydrocarbons in blank samples based on a typical sample amount.

| sample      | benzo[ <i>b</i> ] fluoranthene<br>[µg/kg] | benzo[ <i>k</i> ]fluoranthene<br>[µg/kg] | benzo[ <i>a</i> ]pyrene<br>[µg/kg] | indeno[1,2,3, <i>c,d</i> ] pyrene<br>[µg/kg] | dibenzo[ <i>a,h</i> ]anthracene<br>[µg/kg] | Benzo[ <i>g,h,i</i> ]perylene<br>[µg/kg] | sum 16 PAHs<br>[µg/kg] |
|-------------|-------------------------------------------|------------------------------------------|------------------------------------|----------------------------------------------|--------------------------------------------|------------------------------------------|------------------------|
| blank TH1-1 | <0.01                                     | 0.23                                     | <0.01                              | <0.01                                        | <0.01                                      | <0.01                                    | 7.70                   |
| blank TH1-2 | 0.18                                      | 0.59                                     | <0.01                              | <0.01                                        | <0.01                                      | <0.01                                    | 7.07                   |
| blank TH1-3 | <0.01                                     | <0.01                                    | <0.01                              | <0.01                                        | <0.01                                      | <0.01                                    | 4.51                   |
| blank TH1-4 | <0.01                                     | <0.01                                    | <0.01                              | <0.01                                        | <0.01                                      | <0.01                                    | 12.52                  |
| blank TH2-1 | <0.01                                     | <0.01                                    | <0.01                              | <0.01                                        | <0.01                                      | <0.01                                    | 12.52                  |
| blank TH2-2 | <0.01                                     | <0.01                                    | <0.01                              | <0.01                                        | <0.01                                      | <0.01                                    | 6.31                   |
| blank TH2-3 | <0.01                                     | <0.01                                    | <0.01                              | 2.24                                         | <0.01                                      | 1.88                                     | 10.58                  |
| blank TH2-4 | 1.21                                      | <0.01                                    | <0.01                              | <0.01                                        | <0.01                                      | <0.01                                    | 6.90                   |
| blank TH3-1 | <0.01                                     | <0.01                                    | <0.01                              | <0.01                                        | <0.01                                      | <0.01                                    | 21.96                  |
| blank TH3-2 | <0.01                                     | <0.01                                    | <0.01                              | <0.01                                        | <0.01                                      | <0.01                                    | 31.16                  |
| blank TH3-3 | <0.01                                     | <0.01                                    | <0.01                              | <0.01                                        | <0.01                                      | <0.01                                    | 9.98                   |
| blank TH3-4 | <0.01                                     | <0.01                                    | <0.01                              | <0.01                                        | <0.01                                      | <0.01                                    | 8.05                   |
| blank TH3-5 | 0.20                                      | 0.32                                     | <0.01                              | <0.01                                        | <0.01                                      | <0.01                                    | 9.36                   |
| blank TH3-6 | <0.01                                     | <0.01                                    | <0.01                              | <0.01                                        | <0.01                                      | <0.01                                    | 11.39                  |
| blank ENG   | <0.01                                     | <0.01                                    | <0.01                              | <0.01                                        | <0.01                                      | 0.11                                     | 10.78                  |
| blank OAR-1 | <0.01                                     | <0.01                                    | <0.01                              | <0.01                                        | <0.01                                      | 0.21                                     | 11.69                  |
| blank OAR-2 | 0.15                                      | 0.16                                     | 0.16                               | <0.01                                        | <0.01                                      | 0.17                                     | 7.22                   |
| blank ST    | 0.16                                      | 0.03                                     | 0.12                               | <0.01                                        | <0.01                                      | <0.01                                    | 11.43                  |
